## Reduction of blood oxygen levels enhances postprandial cardiac hypertrophy in Burmese python (*Python molurus*)

Christopher E. Slay<sup>1,2</sup>, Sanne Enok<sup>2,3</sup>, James W. Hicks<sup>1</sup>, Tobias Wang<sup>2\*</sup>

<sup>1</sup>Department of Ecology and Evolutionary Biology, University of California Irvine, Irvine, CA, USA

<sup>2</sup>Zoophysiology, Institute for Biological Sciences, Aarhus University, Aarhus, Denmark.

<sup>3</sup>Inderdisciplinary Nanoscience Center, Aarhus University, Aarhus, Denmark

running header: Postprandial cardiac growth

*Keywords:* Cardiac hypertrophy, cardiovascular regulation, Burmese python, reptile, heart, digestion, postprandial, SDA, anemia

\*Corresponding Author:

Professor Tobias Wang

Zoophysiology, Department of Biosciences

Aarhus University

Building 1131, Universitetsparken

8000 Aarhus C

DENMARK

tel (+45) 5137 7737

email: [tobias.wang@biology.au.dk](mailto:tobias.wang@biology.au.dk)

## Summary

1  
2  
3 Physiological cardiac hypertrophy is characterized by reversible enlargement of cardiomyocytes  
4 and changes in chamber architecture, which increase stroke volume and  $\dot{V}O_2\text{max}$  via augmented  
5 convective oxygen transport. Cardiac hypertrophy is known to occur in response to repeated  
6 elevations of  $O_2$  demand and/or reduced  $O_2$  supply in several species of vertebrate ectotherms,  
7 including postprandial Burmese pythons (*Python molurus*). Recent data suggest postprandial  
8 cardiac hypertrophy in *P. molurus* is a facultative rather than obligatory response to digestion,  
9 though the triggers of this response are unknown. Here we hypothesize that an  $O_2$  supply-demand  
10 mismatch stimulates postprandial cardiac enlargement in Burmese pythons. To test this  
11 hypothesis, we rendered animals anemic prior to feeding, essentially halving blood oxygen  
12 content during the postprandial period. Fed anemic animals had heart rates 126% higher than  
13 fasted controls, which, coupled with a 71% increase in mean arterial pressure suggests fed  
14 anemic animals were experiencing significantly elevated cardiac work. We found significant  
15 cardiac hypertrophy in fed anemic animals, which exhibited ventricles 39% larger than fasted  
16 controls and 28% larger than fed controls. These findings support our hypothesis that those  
17 animals with a greater magnitude of  $O_2$  supply-demand mismatch exhibit the largest hearts. The  
18 “low  $O_2$  signal” stimulating postprandial cardiac hypertrophy is likely mediated by elevated  
19 ventricular wall stress associated with postprandial hemodynamics.

20

## 1. Introduction

21 Burmese pythons, like many large snakes, utilize an intermittent “sit-and-wait” feeding strategy,  
22 where prolonged fasts are punctuated by brief and voracious feeding bouts when prey is  
23 available (Pope, 1961). Digestion of these large meals (up to 25-100% of their body mass) is  
24 associated with pronounced upregulation of a suite of digestive functions (Secor and Diamond,  
25 1997) and a large postprandial increase in oxygen uptake ( $\dot{V}O_2$ ), termed specific dynamic action  
26 (SDA), where  $\dot{V}O_2$  may exceed that during aerobic activity and last for several days (Secor and  
27 Diamond, 1997; Secor and Diamond, 1998; Secor, 2008a; McCue, 2008; Secor, 2008b; Cox and  
28 Secor, 2008; Secor and White, 2010; Wang *et al.*, 2001). To support the high  $\dot{V}O_2$  during  
29 digestion, cardiac output increases drastically above resting values through a combination of  
30 increased stroke volume and heart rate (Secor *et al.*, 2000; Secor and White, 2010). This  
31 hemodynamic response is mitigated largely by a reduction in cholinergic tone and positive  
32 chronotropic effects of non-adrenergic-non-cholinergic (NANC) factors, including an increased  
33 histaminergic tone (Wang *et al.*, 2001; Skovgaard *et al.*, 2008; Enok *et al.*, 2012, 2013).

34 The rise in stroke volume has been linked with a 40% increase in ventricular mass within 48h  
35 of eating (Andersen *et al.*, 2005) that Riquelme *et al.* (2011) described as “physiologic” in nature  
36 and triggered by humoral factors, including increased levels of circulating free fatty acids. The  
37 universality and stimulus of the postprandial cardiac hypertrophy, however, remain unclear since  
38 Jensen *et al.* (2010) found no postprandial cardiac hypertrophy in Burmese or Ball pythons  
39 (*Python regius*) under a similar experimental protocol. Jensen *et al.* (2010) argued, therefore, that  
40 postprandial cardiac hypertrophy should be considered a “facultative” rather than “obligatory”  
41 response to feeding and the lack of postprandial cardiac hypertrophy was recently reported in  
42 two additional studies (Hansen *et al.*, 2013; Enok *et al.*, 2013).

43 The correlation between the magnitudes of SDA and postprandial cardiac hypertrophy is not  
44 well understood. Thus, while  $\dot{V}O_2$  consistently increases following feeding, the postprandial  
45 cardiac hypertrophy is inconsistent. We hypothesize that postprandial cardiac hypertrophy is  
46 triggered when systemic metabolic demand outpaces systemic oxygen delivery. To investigate  
47 this hypothesis, we induced an oxygen supply-demand mismatch in postprandial pythons by  
48 rendering specimens anemic prior to feeding with the prediction that anemic pythons would  
49 exhibit greater postprandial cardiac hypertrophy than fasted pythons with normal blood oxygen  
50 levels.

## 2. Materials and Methods

### 2.1. Animal acquisition and husbandry

Burmese pythons (*Python molurus*; Kuhl 1820; n=31) of both sexes were acquired from commercial vendors and housed for several months prior to experimentation at the vivarium facilities of Aarhus University or the University of California, Irvine. Animals ranged from 0.24 kg to 11.5 kg with a mean body mass of  $1.83 \text{ kg} \pm 0.52 \text{ kg}$ . Snakes were kept in individual vivaria at 27-30°C, and had access to heated surfaces that reached 32°C. A 12h light:12h dark photoperiod was maintained. All animals always had access to water, vigorously consumed rodent meals every 1-2 weeks, and gained mass during captivity. All snakes fasted for a minimum of 28 days prior to experimentation. Animals were housed and treated according to Danish Federal Regulations and UCI IACUC protocol 2009-2821.

### 2.2. Surgical procedures

Snakes (27 of the 31) were instrumented with arterial catheters for measurement of blood pressure (MAP) and heart rate ( $f_H$ ), as well as for withdrawal of arterial blood samples to determine blood oxygen concentration ( $C_{O_2}$ ) and blood pH. To induce anesthesia, individual snakes were placed in a sealed container containing gauze soaked in isoflurane (Baxter, Allerød, Denmark) until they lost muscle tone and could be intubated for artificial ventilation with 2% isoflurane at 5 breaths  $\text{min}^{-1}$  and 50  $\text{ml kg}^{-1}$  tidal volume, using a vaporizer (EZ-155, EZ Systems, Bethlehem, PA, USA) and an HI 665 Harvard Apparatus respirator (Holliston, Massachusetts, USA). A 5 cm incision close to the cloaca enabled the dorsal aorta to be accessed by blunt dissection, so a catheter (PE-50) containing heparinized saline (50 IU/ml), could be inserted and externalized via a small cutaneous puncture and secured to the skin with 2-0 braided silk suture. Approximately 0.15ml of whole blood was then withdrawn from the catheter to determine hematocrit (Hct) by spinning the blood in glass capillaries for 3 min at 12,000 rpm.

Subsets of 14 randomly selected snakes were rendered “anemic” (see discussion of experimental groups, below) by withdrawing blood while the snakes were still anaesthetized. Aliquots of 10% of the estimated blood volume (6-7% of body mass; Lillywhite and Smits, 1984) were placed in sterile 1.5 ml Eppendorf tubes and centrifuged at 6,000 rpm for 5 min. The supernatant plasma was returned via the arterial catheter. Hct was re-measured 15 min after

82 reinjection of plasma and the process was repeated until Hct was reduced to approximately 10%  
 83 (mean  $10.1 \pm 0.3\%$ ).

84 The snakes were ventilated with room air until they regained muscle tone and resumed  
 85 spontaneous ventilation. They were then returned to their enclosures, given access to water, and  
 86 placed in a 30°C temperature-controlled chamber. Animals were allowed to recover from surgery  
 87 undisturbed in their enclosures for 24 h to ensure low plasma catecholamine levels (Olesen *et al.*,  
 88 2008).

89

### 90 2.3. Experimental and feeding protocols

91 Following the 24 h recovery period, we measured MAP, and  $f_H$  from each snake while they  
 92 remained minimally disturbed in the climactic chamber. The catheters were connected to  
 93 pressure transducers (PX600, Baxter Edwards, Irvine, CA) calibrated with a vertical water  
 94 column and connected to an in-house built amplifier sampling at 200 Hz (MP100 BioPac  
 95 Systems, Inc., Goleta, CA). MAP and  $f_H$  were analysed over 5-10 min intervals.

96 Each animal was randomly assigned to one of 4 treatments: fasted-control (N=8), fasted-  
 97 anemia (N=6), fed-control (N=9), or fed-anemia (N=8). Following the measurements of MAP  
 98 and  $f_H$ , the “fasted” animals remained undisturbed at 30°, whereas “fed” animals consumed  
 99 rodent meals equivalent to  $25 \pm 0\%$  body mass. Contingent upon catheter patency, 48 h after  
 100 recovery (72 h after surgery), MAP and  $f_H$  were obtained and the rate-pressure product (RPP)  
 101 was calculated ( $f_H \times \text{MAP}$ ) from each animal. Cardiac output and thus work was not measured,  
 102 but we used the RPP as a proxy for myocardial work. From each animal, an arterial blood  
 103 sample of approximately 0.5 ml was withdrawn to determine  $C_{O_2}$  (Tucker, 1967), blood pH  
 104 (glass electrode maintained at 30°C and connected to a PHM 73; Radiometer, Copenhagen,  
 105 Denmark), and Hct. Immediately after blood sampling, adrenergic and cholinergic tones were  
 106 assessed by sequential infusion of atropine and propranolol (see Enok *et al.*, 2012) and calculated  
 107 from the standard equations, modified for use of  $f_H$  rather than R-R interval (*e.g.* Altimiras *et al.*,  
 108 1997):

$$109 \quad \text{Chol (\%)} = \frac{\frac{1}{f_{H_{\text{cont}}}} - \frac{1}{f_{H_{\text{atr}}}}}{\frac{1}{f_{H_{\text{dbl}}}}} * 100 \quad (\text{Eq. 1})$$

110 and

111 
$$\text{Adr (\%)} = \frac{\frac{1}{f_{\text{H}_{\text{dbl}}}} - \frac{1}{f_{\text{H}_{\text{atr}}}}}{\frac{1}{f_{\text{H}_{\text{dbl}}}}} * 100 \quad (\text{Eq. 2})$$

112 where  $f_{\text{H}_{\text{cont}}}$  is the control heart rate,  $f_{\text{H}_{\text{atr}}}$  is the heart rate following administration of atropine,  
113 and  $f_{\text{H}_{\text{dbl}}}$  is the double blocked heart rate (i.e. following administration of atropine and  
114 propranolol).

115

#### 116 *2.4. Sacrifice and Tissue Harvest*

117 Immediately following assessment of autonomic tone, animals were euthanized via  
118 intraperitoneal injection of sodium pentobarbital ( $>100 \text{ mg kg}^{-1}$ ) whereupon a long ventral  
119 incision allowed for the heart, liver, stomach, small intestine, large intestine, and kidneys to be  
120 removed. All organs were rinsed with isotonic saline and blotted dry with gauze to remove  
121 blood and chyme before determining wet mass. A small representative sample was removed  
122 from each organ and weighed before and after it had been dried in an oven at  $60^{\circ}\text{C}$  for 72 h to  
123 determine the dry mass:wet mass ( $M_{\text{D}}:M_{\text{W}}$ ) ratio.

124

#### 125 *2.5 Statistical Analyses*

126 Mass-specific organ mass (gram of tissue per kg body mass),  $C_{\text{O}_2}$ ,  $f_{\text{H}}$ , and MAP data were  
127 compared using two-way analysis of variance (ANOVA) and post-hoc Tukey's HSD in JMP  
128 statistical software (Version 7, SAS Institute, Inc., Cary, NC) following assurance of  
129 homogeneity of variance and normal distribution of data. Post-hoc tests were performed only  
130 when the ANOVA yielded significance ( $p \leq 0.05$ ), and were considered significant when  $p \leq$   
131 0.05. Hematocrit, adrenergic tone, cholinergic tone, and  $M_{\text{D}}:M_{\text{W}}$  were arcsin square root  
132 transformed and compared using a two-way ANOVA in JMP. "Effects," where reported, are the  
133 results of the effect tests conducted as part of the ANOVA model and are distinguished by the  
134 single degree of freedom. Regression plots were generated using GraphPad Prism (Version 6,  
135 GraphPad Software, La Jolla, CA, USA) and slopes were analyzed using the software's linear  
136 regression analysis. Slopes of the regression lines were considered significantly different from 0  
137 at the level of  $p \leq 0.05$ . All values are reported as mean  $\pm$  s.e.m.

138

139

140

### 3. Results

#### 3.1 Hematological parameters and blood gases

Our experimental procedure for rendering animals anemic resulted in significantly reduced blood oxygen carrying capacity (Table 1). At the time of sacrifice, anemic animals (both fed and fasted) exhibited 61% lower Hct than controls ( $F_{1,28} = 103.0, p < 0.0001$ ) and 53% lower arterial  $C_{O_2}$  than control animals ( $F_{1,19} = 27.8, p < 0.0001$ ). Among fed animals,  $C_{O_2}$  was significantly reduced in anemic animals as compared to control animals ( $F_{3,19} = 9.4, p < 0.0001$ ), which was critical for testing the hypothesis. Arterial pH did not differ between anemic and control snakes and was not affected by digestion ( $F_{3,21} = 1.15, ns$ ).

#### 3.2 Cardiovascular parameters

While manipulation of Hct alone did not significantly elevate  $f_H$  of fasting snakes, feeding elicited significant increases in  $f_H$  among both anemic (50% increase) and control (78% increase) snakes. Coupling anemia with feeding, however, resulted in a 126% difference between fasted controls and fed anemic snakes (Figure 1A;  $F_{3,20} = 9.2, p < 0.001$ )

MAP was 85% higher in fed controls than in fasted controls and 71% higher in fed anemic animals than in fasted controls (Figure 1B;  $F_{3,20} = 5.9, p < 0.05$ ). As a consequence of the markedly elevated  $f_H$  and MAP, particularly in fed anemic snakes, RPP was 2.9-fold higher in fed anemic snakes than in fasted controls (Figure 1C;  $F_{3,20} = 6.2, p < 0.05$ ).

The changes in  $f_H$  were attended by changes in autonomic tone on the heart (Figure 2). Feeding alone elicited a 42% reduction in adrenergic tone among control animals, but the response was blunted in anemic animals, resulting in more modest 27% reduction. The greatest reduction in adrenergic tone was the 47% difference between fasted anemic snakes and fed control snakes (Figure 2A;  $F_{3,16} = 10.3, p = 0.001$ ).

There were significant effects of digestive status ( $F_{1,16} = 10.4, p < 0.05$ ) and Hct ( $F_{1,16} = 5.0, p < 0.05$ ) on cholinergic tone (Figure 2B), with a modest difference existing between fasted controls and fed controls (47%), and a more impressive difference between fasted controls and fed anemic animals (73%)(Figure 2B;  $F_{3,16} = 8.1, p < 0.005$ ).

170 The effect of feeding alone was significant in determining double-blocked  $f_H$  ( $F_{1,17} =$   
171 16.9,  $p < 0.005$ ) whereas Hct did not have a significant effect ( $F_{1,17} = 2.0$ ,  $ns$ ), but fed anemic  
172 animals had higher  $f_H$  than either group of fasted animals ( $F_{3,17} = 6.9$ ,  $p < 0.005$ ) (Figure 2C).

### 174 3.3 Cardiac hypertrophy

175 Heart mass of snakes with normal Hct did not increase during digestion, and anemia did not  
176 elicit cardiac growth in fasting snakes (Figure 3A). However, the anemic snakes euthanized 48h  
177 into digestion had a ventricular mass of  $1.8 \text{ g kg}^{-1}$ , which is 39% larger than the ventricle of  
178 fasting snakes with normal Hct. Thus, there was a significant difference ( $F_{3,30} = 3.0$ ,  $p < 0.05$ ) in  
179 ventricular wet mass between treatments. The effects of Hct on ventricular mass ( $F_{1,30} = 5.3$ ,  $p <$   
180  $0.05$ ) were greater than the effects of digestion ( $F_{1,30} = 2.6$ ,  $ns$ ). There was no significant  
181 difference in the dry:wet mass ratio between treatments (Figure 3B;  $F_{3,30} = 0.7$ ,  $ns$ )

182 Total wet heart mass, *i.e.* combined ventricular and atrial wet masses, also differed  
183 between treatments (Figure 3C) ( $F_{3,30} = 3.9$ ,  $p < 0.05$ ), with fed anemic animals again having the  
184 largest hearts (38% larger than hearts of fasted controls) animals, but not significantly larger than  
185 hearts of fasted anemic or fed control snakes. Hct exerted a greater effect on ventricular mass  
186 ( $F_{1,29} = 7.3$ ,  $p < 0.05$ ) than digestion ( $F_{1,29} = 2.9$ ,  $ns$ ). Atrial wet mass was also 36% greater in fed  
187 anemic animals than in fasted controls ( $F_{3,30} = 4.3$ ,  $p < 0.05$ ), again, with a significant effect of  
188 Hct ( $F_{1,29} = 8.8$ ,  $p < 0.05$ ) but not feeding status ( $F_{1,29} = 3.5$ ,  $ns$ ). There was no significant  
189 difference in atrial dry:wet mass ratio between groups of animals ( $F_{1,29} = 0.3$ ,  $ns$ ).

190 We correlated ventricular mass with  $f_H$  and the rate-pressure product, where this value  
191 estimates myocardial oxygen consumption and thus provides a proxy for cardiac work (Figure  
192 4). Ventricular mass was positively and linearly correlated with both heart rate (Figure 4A;  $p <$   
193  $0.05$ ,  $R^2 = 0.31$ ) and the rate-pressure product (Figure 4C;  $p < 0.05$ ,  $R^2 = 0.22$ ), however the  
194 relationship between  $f_H$  and ventricular mass was significant among fed animals ( $p < 0.001$ ,  $R^2 =$   
195  $0.69$ ; Figure 4A), but not fasted animals ( $ns$ ,  $R^2 = 0.00$ ; Fig 4B).

### 197 3.4 Plasticity of the digestive organs

198 Stomach wet mass was significantly greater in fed control than fasted control animals (Table 2;  
199  $F_{3,30} = 5.2$ ,  $p < 0.05$ ), but there was no difference in stomach dry mass between groups ( $F_{3,30} =$   
200  $2.4$ ,  $ns$ ). Wet mass of the small intestine was also significantly larger in digesting snakes ( $F_{3,30} =$



201 10.0,  $p < 0.0001$ ), with similar trends for dry mass (albeit with no statistical difference between  
202 fasted anemic and fed control intestines;  $F_{3,30} = 16.0$ ,  $p < 0.005$ ). There were no significant  
203 differences in large intestine mass (wet -  $F_{3,30} = 1.5$ , *ns*; dry -  $F_{3,29} = 2.3$ , *ns*) or liver wet mass  
204 ( $F_{3,30} = 2.4$ , *ns*), whereas liver dry mass differed significantly between groups ( $F_{3,30} = 16.5$ ,  $p <$   
205  $0.005$ ). Fed anemic animals exhibited higher kidney wet mass than fasted controls (84%  
206 enlargement;  $F_{3,30} = 5.3$ ,  $p < 0.05$ ), but there were no significant changes in kidney dry mass  
207 ( $F_{3,27} = 1.7$ , *ns*). While growth of the small intestine was due only to digestion ( $F_{1,30} = 27.1$ ,  $p <$   
208  $0.0001$ ) and not Hct ( $F_{1,30} = 1.7$ , *ns*), both digestion ( $F_{1,30} = 7.8$ ,  $p < 0.05$ ) and Hct ( $F_{1,30} = 7.1$ ,  $p$   
209  $< 0.05$ ) had significant effects on kidney wet mass.

210

211

#### 4. Discussion

212 Our study confirms that feeding alone does not elicit postprandial cardiac hypertrophy. Animals  
213 confronted with the simultaneous challenges of increased O<sub>2</sub> demand (digestion) and reduced O<sub>2</sub>  
214 supply (anemia) do, however, exhibit postprandial cardiac hypertrophy when compared to fasted,  
215 un-manipulated controls. This suggests that cardiac hypertrophy is triggered when oxygen  
216 supply/delivery cannot meet the elevated metabolic demands of digestion. Interestingly, cardiac  
217 mass of several other ectothermic vertebrates also responds to oxygen supply and demand  
218 mismatches, such alligators reared in hypoxia (Warburton et al., 1995; Crossley et al., 2005;  
219 Owerkowicz *et al.*, 2009) or fish rendered anemic (e.g. Sun et al., 2009; Simonot and Farrell,  
220 2005).

221

222 Our findings conflict with the previous reports of an obligatory postprandial cardiac  
223 hypertrophy (e.g. Andersen *et al.*, 2005; Riquelme *et al.*, 2011), and supports the proposal that  
224 postprandial cardiac hypertrophy is a facultative response in pythons (Jensen *et al.*, 2011;  
225 Hansen *et al.*, 2013; Enok *et al.*, 2013). In contrast, postprandial enlargement of the small  
226 intestine, liver, and kidneys seems consistent amongst studies (Secor and Diamond, 1995; Secor  
227 and Diamond 1998; Starck and Beese, 2001; Ott and Secor, 2006; Cox and Secor, 2008; Jensen  
228 *et al.*, 2011; Hansen *et al.*, 2012; Enok *et al.*, 2013). Consistent with the idea that expansion of  
229 the intestine is stimulated by the presence of chyme in the intestine (Secor *et al.*, 2000), there  
230 was no effect of reducing Hct on the rise in intestinal mass during digestion, though it is  
231 impressive that significant intestinal hypertrophy occurs in animals with severe oxygen  
limitation. Enlargement of the stomach seems to be another facultative response to digestion, as

232 it is noted in some studies (Secor and Diamond, 1995, Jensen et al., 2011), but not others (Cox  
233 and Secor, 2008; Ott and Secor, 2006). As in other studies (Secor and Diamond, 1995; Jensen et  
234 al. 2011), kidney wet mass increased with digestion, but we also note that snakes with reduced  
235 Hct had enlarged kidneys, which may result from a stimulation of erythropoietic functions, but  
236 dry kidney mass did not differ between groups.

237         As shown in earlier studies (Wang *et al.*, 2001; Skovgaard *et al.*, 2008; Enok *et al.*, 2012,  
238 2013), the postprandial tachycardia is largely governed by a reduction of cholinergic tone on the  
239 heart, whereas the adrenergic tone actually decreases during digestion. In the double-blocked  
240 heart, there was also a rise in the postprandial  $f_H$  resulting from a circulating NANC factors  
241 (Skovgaard *et al.*, 2008), although the specific nature of the stimulus remain to be identified  
242 (Enok *et al.*, 2012). Given that the NANC factor is likely to be released in direct response to  
243 digestion, possibly as a peptide from the digestive organs, it is not surprising that anemia did not  
244 affect the double-blocked  $f_H$ . The rise in  $f_H$  of the anemic snakes was likely a barostatic response  
245 to vasodilation and an attending lowering of total peripheral resistance in response to lowered  
246 blood  $C_{O_2}$ , but could also result from stimulation of chemoreceptors (Wang *et al.*, 1994; 1997;  
247 Andersen *et al.*, 2003). In contrast to previous studies on digesting snakes, the postprandial  
248 tachycardia in our study was associated with a significant rise in MAP. However, because MAP  
249 did not increase proportionally to the rise in  $f_H$ , and because stroke volume is likely to have been  
250 elevated, digestion was probably attended by a reduced total peripheral resistance as blood flows  
251 to the digestive organs increase during digestion (Secor *et al.*, 2000; Starck and Wimmer, 2005;  
252 Secor and White, 2010). In addition, lowering of Hct is likely to have reduced blood viscosity  
253 and hence could have alleviated the workload on the heart. However, anemia did not influence  
254 MAP, and the anemic snakes therefore did have a higher rate pressure product than animals with  
255 normal Hct.

256         The observation that the postprandial cardiac hypertrophy of pythons is facultative rather  
257 than obligatory indicate that other factors than circulating signal molecules are involved, and our  
258 results suggest that increased cardiac work or myocardial oxygen consumption stimulate the  
259 postrandial cardiac growth in pythons. Compared to resting animals, postprandial cardiac growth  
260 was elicited in anemic snakes with significantly higher rate pressure product, suggesting  
261 increased workload and greater mechanical stress on the ventricles. In mammals, the molecular  
262 pathways stimulating physiologic cardiac hypertrophy are stimulated by increased mechanical

263 stress, such that increased workload stimulates myocytes to synthesize and release growth  
264 factors, including insulin-like growth factor I (IGF-I; Serner *et al.*, 1999; Hill and Olson, 2008).  
265 These growth factors are then involved in paracrine and/or autocrine activation of the  
266 phosphatidylinositol 3'-kinase (PI3K)-Akt-mTOR pathway, which ultimately leads to synthesis  
267 of contractile elements (Dorn and Force, 2005; Shiojima and Walsh, 2006; Dorn, 2007; Hill and  
268 Olson, 2008). AMPK, Akt, GSK3 $\beta$ , and mTOR, all signalling molecules in mammalian  
269 physiologic hypertrophy pathways mediated by mechanical stress, are known to be active in the  
270 python model (Riquelme *et al.*, 2011). This suggests that the cardiac hypertrophy in pythons  
271 occur in response to elevated mechanical stress on ventricular myocytes. This obviously does not  
272 rule out that circulating factors, such as free fatty acids (Riquelme *et al.*, 2011), may contribute  
273 to the postprandial hypertrophy. Nevertheless, such humoral regulation does not appear adequate  
274 without a sufficient elevation of cardiac work and mechanical stress.

275

#### 276 4.5 General conclusions

277 Despite the universal presence of gastrointestinal hypertrophies in fed pythons, our study  
278 supports the concept that postprandial cardiac hypertrophy is not an obligatory response to  
279 elevated oxygen demands associated with digestion in the python. We describe postprandial  
280 cardiac hypertrophy in fed anemic animals, whose hearts are operating at significantly elevated  
281  $f_H$  (as mediated by reduced  $C_{O_2}$ , subsequently reduced cholinergic tone, and the presence of a  
282 significant NANC tone), and elevated cardiac work (as indicated by the rate pressure product).  
283 We posit that regardless of the potential for other humoral signals (Riquelme *et al.*, 2011),  
284 significantly elevated cardiac work is required to “trigger” the postprandial hypertrophy *via*  
285 common physiologic hypertrophy signaling pathways. However, the precise level of cardiac  
286 work needed to induce cardiac hypertrophy is difficult to assess from the current analysis, as the  
287 experimental paradigm depends on a group analysis. Experiments measuring systemic flow,  $f_H$ ,  
288 MAP,  $\dot{V}O_2$ , and heart size/mass need to be correlated during fasting and digestion, within  
289 individual animals. Advanced imaging techniques, which are becoming increasingly accessible  
290 to comparative physiologists (e.g. Hansen *et al.*, 2013), in combination with classical  
291 physiological measurements would provide the information to determine the trigger level needed  
292 to induce postprandial cardiac hypertrophy in the Burmese python.

293

294 **5. List of abbreviations**

- 295 ANOVA – analysis of variance
- 296 C<sub>O<sub>2</sub></sub> – blood oxygen concentration
- 297  $f_H$  – heart rate
- 298 Hct - hematocrit
- 299 NANC – non-adrenergic, non-cholinergic
- 300 MAP – mean arterial blood pressure
- 301 SDA – specific dynamic action
- 302 SMR – standard metabolic rate
- 303 RPP – rate pressure product

304

305 **Acknowledgements**

306 We owe many thanks to Rasmus Buchanan and Heidi Jensen for technical assistance and  
307 animal husbandry. Funding of experimental work was provided by the Danish Research Council  
308 to TW; National Science Foundation [grant IOS-0922756 to JWH; Graduate Research  
309 Fellowship to CES]; and Society for Integrative and Comparative Biology [Fellowship for  
310 Graduate Student Travel to CES].

311

312

313 **References**

- 314 **Altimiras, J., Aissaoui, A., Tort, L. and Axelsson, M.** (1997). Cholinergic and adrenergic tones  
315 in the control of heart rate in teleosts. How should they be calculated? *Comp. Biochem.*  
316 *Physiol.* **118A**, 131-139.
- 317 **Andersen, J.B., Hedrick, M.S. and Wang, T.** (2003) Cardiovascular responses to hypoxia and  
318 anemia in the toad *Bufo marinus*. *J. Exp. Biol.* **206**, 857-865.
- 319 **Andersen, J., Rourke, B.C., Caiozzo, V.J., Bennett, A.F. and Hicks, J.W.** (2005) Postprandial  
320 cardiac hypertrophy in pythons. *Nature* **434**, 37-28.
- 321 **Badeer, H.S.** (1964) Biological significance of cardiac hypertrophy. *Am. J. Cardiol.* **14**, 133-  
322 138.
- 323 **Busk, M., Overgaard, J., Hicks, J.W., Bennett, A.F. and Wang, T.** (2000) Effects of feeding  
324 on arterial blood gases in the American alligator *Alligator mississippiensis*. *J. Exp. Biol.*  
325 **203**, 3117-3124.
- 326 **Cox, C.L. and Secor, S.M.** (2008) Matched regulation of gastrointestinal performance in the  
327 Burmese python, *Python molurus*. *J. Exp. Biol.* **211**, 1131-1140.
- 328 **Crossley, DA and Altimiras, J.J.** (2005) Cardiovascular development in embryos of the  
329 American alligator *Alligator mississippiensis*: effects of chronic and acute hypoxia. *J.*  
330 *Exp. Biol.* **208**, 31-39.
- 331 **Dorn II, G.W.** (2007) The Fuzzy Logic of Physiological Cardiac Hypertrophy. *Hypertension* **49**,  
332 962-970
- 333 **Dorn II, G.W. and Force, T.** (2005) Protein kinase cascades in the regulation of cardiac  
334 hypertrophy. *J. Clin. Invest.* **115**, 527-537.
- 335 **Dorn II, G.W., Robbins, J. and Sugden, P.H.** (2003) Phenotyping hypertrophy: eschew  
336 obfuscation. *Circ. Res.* **92**, 1171-1175.
- 337 **Drabkin, D.L., and Austin, J.H.** (1935) Spectro- photometric studies. II. Preparations from  
338 washed blood cells; nitric oxide hemoglobin and sulfhemoglobin. *J. Biol. Chem.*, **112**, 51.
- 339 **Eme, J. Owerkowicz, T., Gwalthney, J., Blank, J.M., Rorke, B.C. and Hicks, J.W.** (2009)  
340 Exhaustive exercise training enhances aerobic capacity in American alligator (*Alligator*  
341 *mississippiensis*). *J. Comp. Physiol. B.* **179**, 921-931.

- 342 **Enok, S., Simonsen, L.S., Pedersen, S.V., Wang, T. and Skovgaard, N.** (2012) Humoral  
343 regulation of heart rate during digestion in pythons (*Python molurus* and *Python regius*).  
344 *Am. J. Physiol.* **302**, R1176-R1183.
- 345 **Enok S., Simonsen L. S. and Wang T.** (2013) The contribution of gastric digestion and  
346 ingestion of amino acids on the postprandial rise in oxygen consumption, heart rate and  
347 growth of visceral organs in pythons. *Comp. Biochem. Physiol.* **165A**, 46-53.
- 348 **Hansen, K., Pedersen, P.B.M., Pedersen, M. and Wang, T.** (2013) Magnetic Resonance  
349 Imaging volumetry for non-invasive measures of phenotypic flexibility during digestion  
350 in Burmese pythons. *Physiol. Zool.* **86**, 149-158.
- 351 **Hicks, J.W. and Wood, S.C.** (1985) Temperature regulation in lizards: effects of hypoxia. *Am.*  
352 *J. Physiol.* **248**, R595-R600.
- 353 **Hill, J.A. and Olson, E.N.** (2008) Mechanisms of disease: Cardiac plasticity. *New Engl. J. Med.*  
354 **13**, 1370-1380.
- 355 **Hunter, J.J. and Chien, K.R.** (1999) Mechanisms of disease: Signaling pathways for cardiac  
356 hypertrophy and failure. *New Engl. J. Med.* **341**, 1276-1283.
- 357 **Jensen, B., Larsen, C.K., Nielsen, J.M, Simonsen, L.S. and Wang, T.** (2011) Change of  
358 cardiac function, but not form, in postprandial pythons. *Comp. Biochem. Physiol.* **160A**,  
359 35-42.
- 360 **Lillywhite, H.B. and Smits, A.W.** (1984) Lability of blood volume in snakes and its relation to  
361 activity and hypertension. *J. Exp. Biol.* **110**, 267-274.
- 362 **McCue, M.D.** (2006) Specific dynamic action: A century of investigation. *Comp. Biochem.*  
363 *Physiol.* **144A**, 381–394
- 364 **Olesen, M.G, Bertelsen, M.F., Perry, S.F. and Wang, T.** (2008) Effects of preoperative  
365 administration of butorphanol or meloxicam on physiologic responses to surgery in ball  
366 pythons. *J. Am. Vet. Med. Assoc.* **233**, 1883-1888.
- 367 **Ott, B.D. and Secor, S.M.** (2006) Adaptive regulation of digestive performance in the genus  
368 *Python*. *J. Exp. Biol.* **210**, 340-356.
- 369 **Overgaard, J and Wang, T.** (2002) Increased blood oxygen affinity during digestion in the  
370 snake *Python molurus*. *J. Exp. Biol.* **205**, 3327-3334.

- 371 **Overgaard, J., Busk, M., Hicks, J.W., Jensen, F.B. and Wang, T.** (1999) Respiratory  
372 consequences of feeding in the snake *Python molurus*. *Comp. Biochem. Physiol.* 124A,  
373 359-365.
- 374 **Owerkowicz, T., Elsey, R.M. and Hicks, J.W.** (2009) Atmospheric oxygen level affects growth  
375 trajectory, cardiopulmonary allometry, and metabolic rate in American alligator  
376 (*Alligator mississippiensis*). *J. Exp. Biol.* **212**, 1237-1247.
- 377 **Pope, C.H.** (1961) The Giant Snakes. Knopf, New York, NY.
- 378 **Riquelme, C.A., Magida, J.A., Harrison, B.C., Wall, C.E., Marr, T.G., Secor, S.M. and**  
379 **Leinwand, L.A.** (2011) Fatty Acids Identified in the Burmese Python Promote Beneficial  
380 Cardiac Growth. *Science* **334**, 528-531.
- 381 **Shiojima, I. and Walsh, K.** (2006) Regulation of cardiac growth and coronary angiogenesis by  
382 the Akt/PKB signaling pathway. *Genes Dev.* **20**, 3347-3365.
- 383 **Skovgaard, N., Møller, K., Gesser, H. and Wang, T.** (2008) Histamine induces postprandial  
384 tachycardia through a direct effect on cardiac H<sub>2</sub>-receptors in pythons. *Am. J. Physiol.*  
385 **296**, R774-R785.
- 386 **Secor, S.M.** (2008a) Digestive physiology of the Burmese python: broad regulation of integrated  
387 performance. *J. Exp. Biol.* **211**, 3757-3774
- 388 **Secor, S.M.** (2008b) Specific dynamic action: a review of the postprandial metabolic response.  
389 *J. Comp. Physiol. B.* **159**, 1-56.
- 390 **Secor, S.M. and Diamond, J.** (1995) Adaptive responses to feeding in Burmese pythons: pay  
391 before pumping. *J. Exp. Biol.* **198**, 1313-1325.
- 392 **Secor, S. M. and Diamond, J.** (1997) Determinants of post-feeding metabolic response in  
393 Burmese pythons (*Python molurus*). *Physiol. Zool.* **70**, 202–212;
- 394 **Secor, S.M. and Diamond, J.** (1998) A vertebrate model of extreme physiological regulation.  
395 *Nature* **395**, 659-662
- 396 **Secor, S.M. and White, S.E.** (2010) Prioritizing blood flow: cardiovascular performance in  
397 response to the competing demands of locomotion and digestion for the Burmese python,  
398 *Python molurus*. *J. Exp. Biol.* **213**, 77-88.

399



- 400 **Secor S.M., Hicks J.W. and Bennett AF.** (2000) Ventilatory and cardiovascular responses of a  
401 python (*Python molurus*) to exercise and digestion. *J. Exp. Biol.* **203**, 2447–2454.
- 402 **Secor, S.M., Whang, E.E., Lane, J.S., Ashley, S.W. and Diamond, J.** (2000). Luminal and  
403 systemic signals trigger intestinal adaptation in the Burmese python (*Python molurus*).  
404 *Am. J. Physiol.* **279**, G1177-G1187.
- 405 **Secor, S.M., Nagy, T.R., Johnston, K.E. and Tamura, T.** (2001) Effect of feeding on  
406 circulating micronutrient concentrations in the Burmese python (*Python molurus*). *Comp.*  
407 *Biochem. Physiol.* **129A**, 673-679.
- 408 **Sernerri, G.G.N, Modesti, P.A., Boddi, M., Cecioni, I., Paniccia, R., Coppo, M., Galanti, G.,**  
409 **Simonetti, I., Vanni, S., Papa, L. et al.** (1999) Cardiac growth factors in human  
410 hypertrophy: relations with myocardial contractility and wall stress. *Circ. Res.* **85**, 57-67
- 411 **Simonot, D.L. and Farrell, A.P.** (2007) Cardiac remodeling in rainbow trout *Oncorhynchus*  
412 *mykiss* Walbaum in response to phenylhydrazine-induced anemia. *J. Exp. Biol.* **210**,  
413 1574-1584.
- 414 **Starck, J. M. and Beese K.** (2001). Structural flexibility of the intestine of Burmese python in  
415 response to feeding. *J. Exp. Biol.* **204**, 325–335.
- 416 **Starck J. M., and Wimmer C.** (2005). Patterns of blood flow during the postprandial response  
417 in ball pythons, *Python regius*. *J. Exp. Biol.* **208**, 881-889.
- 418 **Sun, X., Hoage, T., Bai, P., Ding, Y., Chen, Z., Zhang, R., Huang, W., Jahangir, A., Paw,**  
419 **B., Li, Y.G. et al.** (2009). Cardiac hypertrophy involves both myocyte hypertrophy and  
420 hyperplasia in anemic zebrafish. *PLoS ONE.* **4**, e6596.
- 421 **Tucker, V.A.** (1967) Method for oxygen content and dissociation curves on microliter blood  
422 samples. *J. Appl. Physiol.* **23**, 410–414.
- 423 **Warburton, S.J., Hastings, D. and Wang, T.** (1995) Responses to chronic hypoxia in  
424 embryonic alligators. *J. Exp. Biol.* **73**, 44-50.
- 425 **Wang, T., Burggren, W. and Nobrega, E.** (1995) Metabolic, ventilator, and acid-base  
426 responses associated with Specific Dynamic Action in the toad *Bufo marinus*. *Physiol.*  
427 *Zool.* **68**, 192-205.



- 428 **Wang, T., E. Krosniunas, and J.W. Hicks** (1997). The role of cardiac shunts in the regulation  
429 of arterial blood gases. *Am. Zool.* **37**, 12-22.
- 430 **Wang, T., L.G.S. Branco and M.L. Glass** (1994). Ventilatory responses to hypoxia in the toad  
431 *Bufo paracnemis* before and after a decrease in haemoglobin oxygen-carrying capacity. *J.*  
432 *Exp. Biol.***186**, 1-8.
- 433 **Wang, T, Taylor, E.W., Andrade, D. and Abe, A.S.** (2001) Autonomic control of heart rate  
434 during forced activity and rest in the snake *Boa constrictor*. *J. Exp. Biol.* **204**, 3553-3560.
- 435 **Wang, T., Busk, M. and Overgaard, J.** (2001) The respiratory consequences of feeding in  
436 amphibians and reptiles. *Comp. Biochem. Physiol.* **128A**, 535-549.
- 437 **Wagner, P.D.** (1996) Determinants of maximal oxygen transport and utilization. *Ann. Rev.*  
438 *Physiol.* **58**, 21-50.

**Table 1.** Blood parameters in fasting and fed pythons. Values which share Latin character superscripts are not statistically different from one another.

|                                  | Fasted                   |                        | Fed                    |                        |
|----------------------------------|--------------------------|------------------------|------------------------|------------------------|
|                                  | Control                  | Anemic                 | Control                | Anemic                 |
| C <sub>O</sub> <sub>2</sub> (mM) | 3.24±0.84 <sup>a,b</sup> | 1.76±0.47 <sup>b</sup> | 3.94±0.24 <sup>a</sup> | 1.69±0.26 <sup>b</sup> |
| Hct (%)                          | 24.0±1.7 <sup>a</sup>    | 7.4±0.5 <sup>b</sup>   | 21.1±1.7 <sup>a</sup>  | 9.9±1.0 <sup>b</sup>   |
| pH                               | 7.49±0.08 <sup>a</sup>   | 7.65±0.05 <sup>a</sup> | 7.60±0.09 <sup>a</sup> | 7.66±0.04 <sup>a</sup> |

439

440

441

**Table 2.** Visceral organ masses. Values which share Latin character superscripts (lower case for wet mass and upper case for dry mass) are not statistically different from one another.

|                 | Wet mass (g kg <sup>-1</sup> ) |                        |                       |                        | Dry mass (g kg <sup>-1</sup> ) |                       |                       |                      |
|-----------------|--------------------------------|------------------------|-----------------------|------------------------|--------------------------------|-----------------------|-----------------------|----------------------|
|                 | Fasted                         |                        | Fed                   |                        | Fasted                         |                       | Fed                   |                      |
|                 | Control                        | Anemic                 | Control               | Anemic                 | Control                        | Anemic                | Control               | Anemic               |
| Stomach         | 12.9±0.8 <sup>a</sup>          | 15.2±1.1 <sup>ab</sup> | 17.7±2.2 <sup>b</sup> | 17.0±1.2 <sup>ab</sup> | 2.7±0.2 <sup>A</sup>           | 2.7±0.1 <sup>A</sup>  | 3.6±0.4 <sup>A</sup>  | 3.6±0.3 <sup>A</sup> |
| Small Intestine | 14.5 ±1.4 <sup>a</sup>         | 17.1±0.8 <sup>a</sup>  | 25.4±3.2 <sup>b</sup> | 29.6±1.7 <sup>b</sup>  | 2.8±0.3 <sup>A</sup>           | 3.0±0.1 <sup>AB</sup> | 4.6±0.9 <sup>BC</sup> | 5.9±0.4 <sup>C</sup> |
| Large Intestine | 8.7±0.7 <sup>a</sup>           | 10.7±1.0 <sup>a</sup>  | 10.2±0.8 <sup>a</sup> | 13.2±2.6 <sup>a</sup>  | 2.2±0.5 <sup>A</sup>           | 1.45±0.1 <sup>A</sup> | 1.4±0.2 <sup>A</sup>  | 1.7±0.2 <sup>A</sup> |
| Liver           | 17.5±1.4 <sup>a</sup>          | 18.7±1.9 <sup>a</sup>  | 22.1±2.6 <sup>a</sup> | 25.5±2.8 <sup>a</sup>  | 5.1±0.4 <sup>A</sup>           | 4.7±0.5 <sup>A</sup>  | 6.1±0.9 <sup>AB</sup> | 8.2±0.8 <sup>B</sup> |
| Kidney          | 4.5±0.4 <sup>a</sup>           | 5.9±0.4 <sup>ab</sup>  | 6.0±0.6 <sup>ab</sup> | 7.7±0.8 <sup>b</sup>   | 0.9±0.1 <sup>A</sup>           | 1.1±0.1 <sup>A</sup>  | 1.4±0.3 <sup>A</sup>  | 1.4±0.2 <sup>A</sup> |

442

443

444 **Figure legends**

445  
446 Figure 1. (A) Heart rates ( $f_H$ ) in fasting and postprandial (48 h into digestion) Burmese pythons  
447 (*Python molurus*). Heart rate was significantly higher in the digesting snakes compared to  
448 fasting. (B) Mean arterial blood pressure was significantly higher in digesting snakes compared  
449 to fasting control snakes, while anemia did not influence MAP. (C) The rate-pressure product  
450 (proxy for cardiac work) was significantly higher in digesting snakes compared to fasted  
451 controls. Groups with the same Latin character do not differ significantly. All data is presented  
452 as mean  $\pm$  s.e.m. Fasted controls, N=4; fasted anemic, N=5; fed controls, N=6; fed anemic, N=7.

453  
454 Figure 2. Adrenergic and cholinergic cardiac tones in fasting and postprandial (48 h into  
455 digestion) Burmese pythons (*Python molurus*). Both cholinergic and adrenergic tones were  
456 lower in digesting snakes, and the cholinergic tone was reduced during anemia in both fasting  
457 and digesting snakes. Groups with the same Latin character do not differ significantly. All data  
458 is presented as mean  $\pm$  s.e.m. Fasted controls, N=3; Fed controls, N=4; Fasted anemic, N=4; Fed  
459 anemic, N=7.

460  
461 Figure 3. Ventricular wet mass, dry to wet mass ratio ( $M_D:M_W$ ) and total heart mass fasting and  
462 postprandial (48 h into digestion) Burmese pythons (*Python molurus*). Ventricular wet mass (A),  
463 was significantly higher in the fed anemic snakes compared to fasting control snakes, while there  
464 were differences in  $M_D:M_W$ . Error bars represent s.e.m. Groups with the same Latin character do  
465 not differ significantly. All data is presented as mean  $\pm$  s.e.m. Fasted control, N=8; Fasted  
466 anemic, N=6; Fed control, N=9; Fed anemic, N=8.

467  
468 Figure 4. Correlation between ventricular wet mass and the rate-pressure product (RPP) in  
469 fasting and fed controls and anemic Burmese pythons. The RPP is equal to the product of the  
470 mean arterial blood pressure (MAP) and heart rate (HR) and is a proxy for cardiac work.

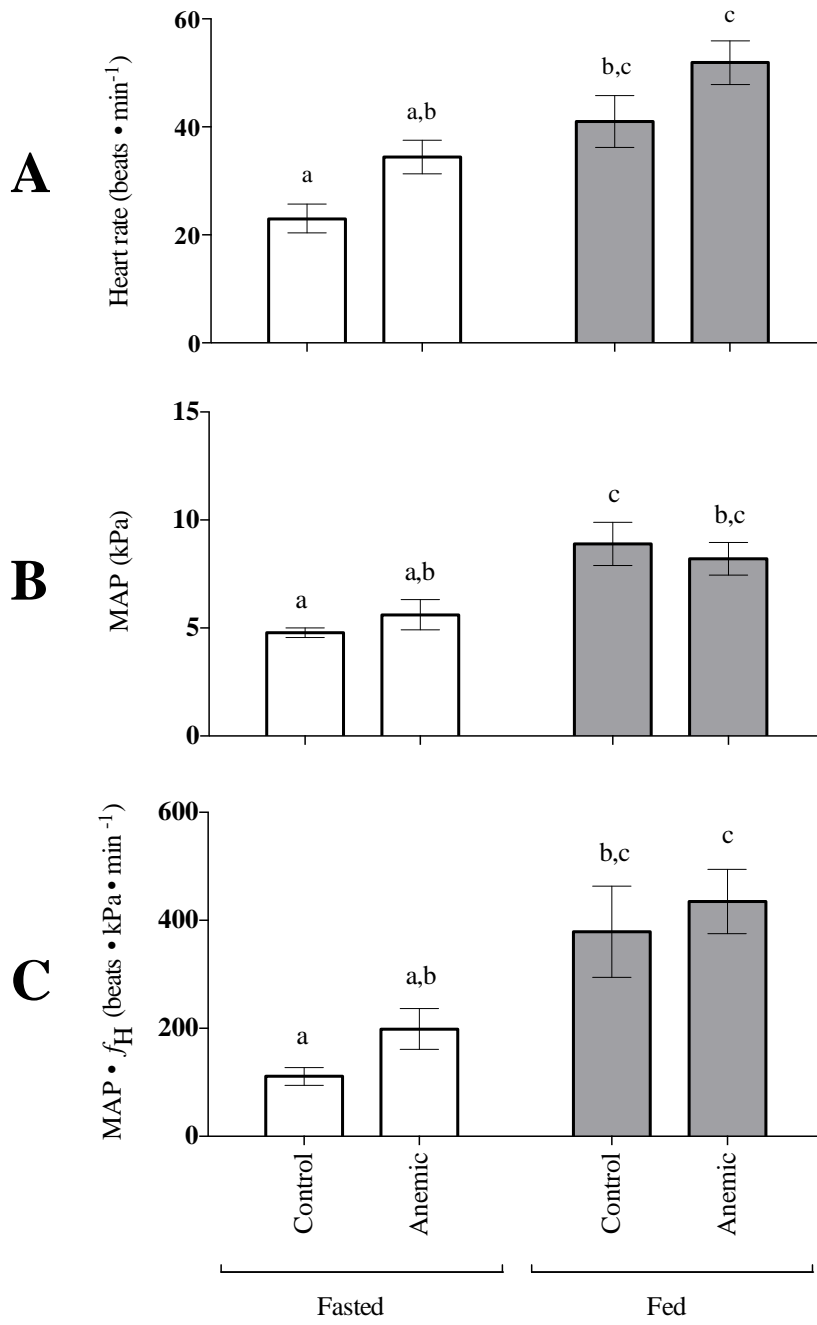

477

478

479

480

481

482

483 Figure 2

484

485

486

487

488

489

490

491

492

493

494

495

496

497

498

499

500

501

502

503

504

505

506

507

508

509

510

511

512

513

514

515

516

517

518

519

520

521

522

523

524

525

526

527

528

529

**A**

Fi

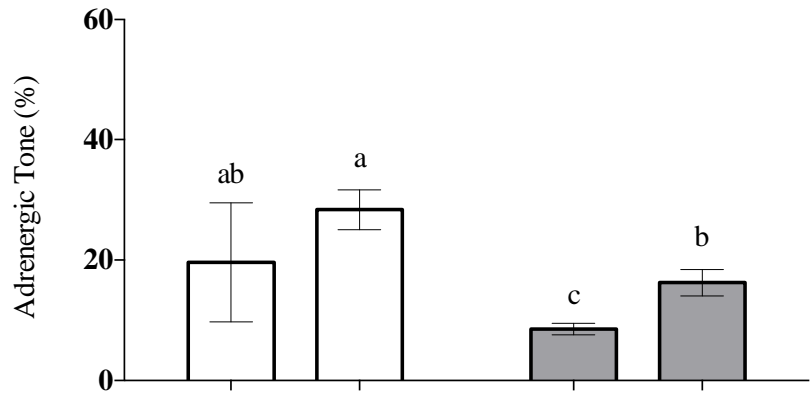

**B**

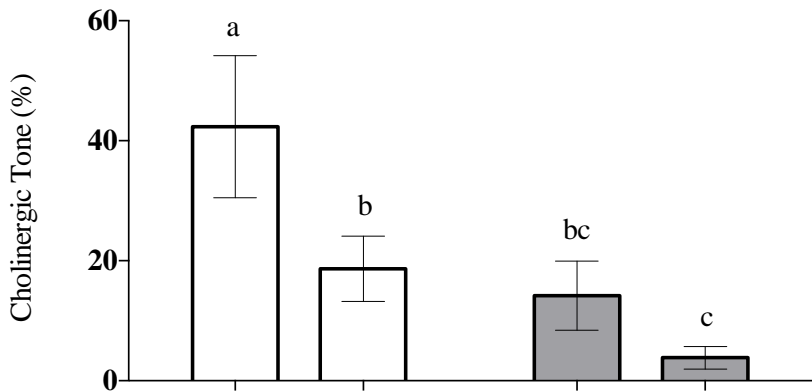

**C**

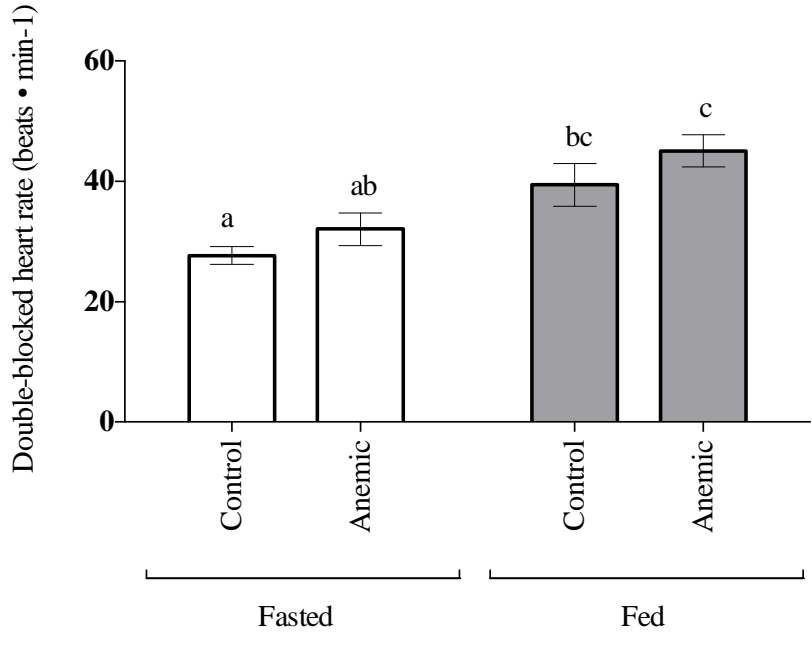

530  
531

Figure 3

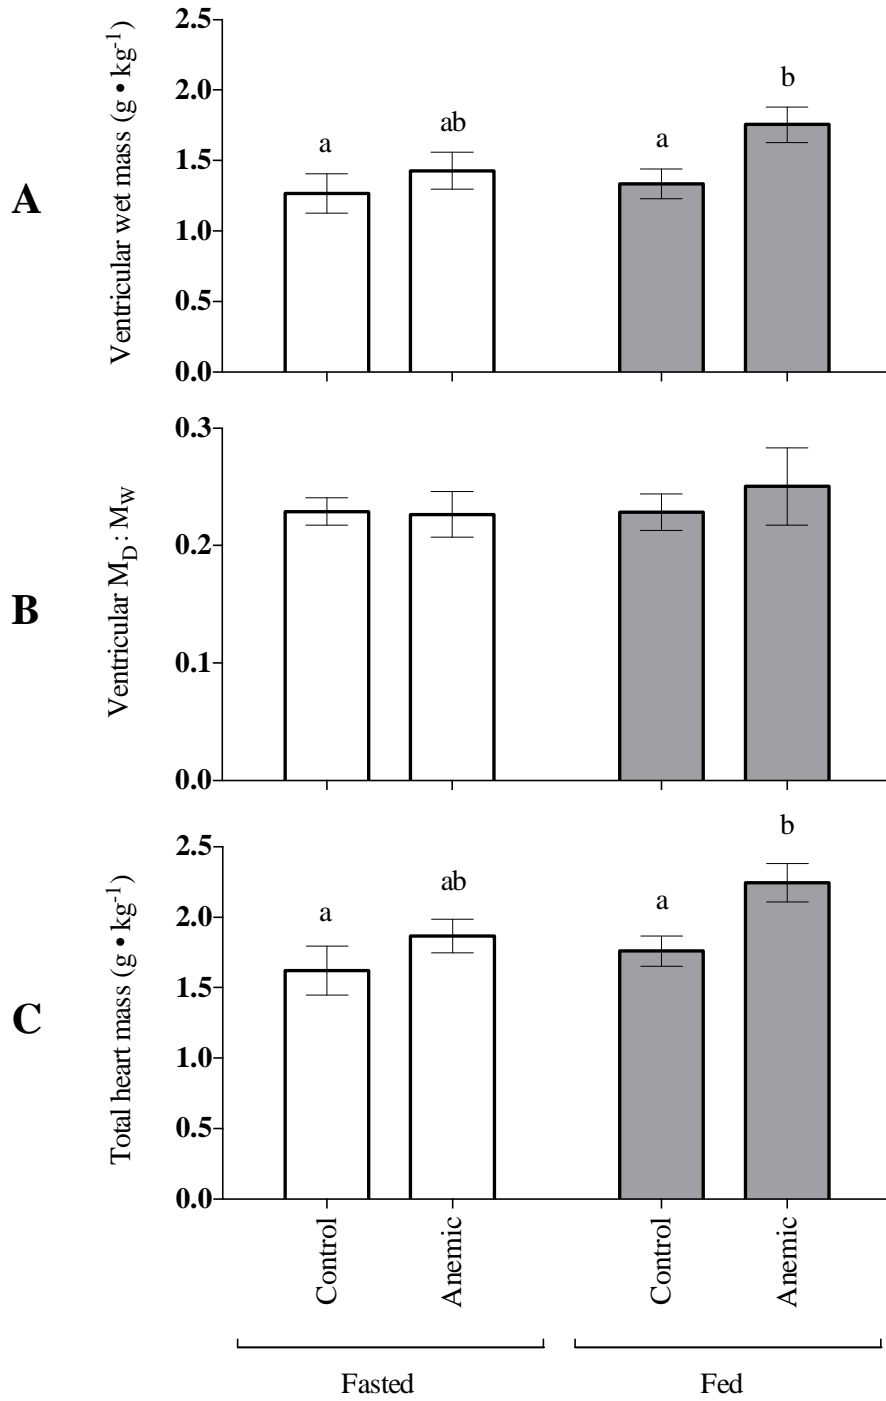

532  
533  
534  
535  
536  
537

538  
539  
540  
541  
542

Figure 4

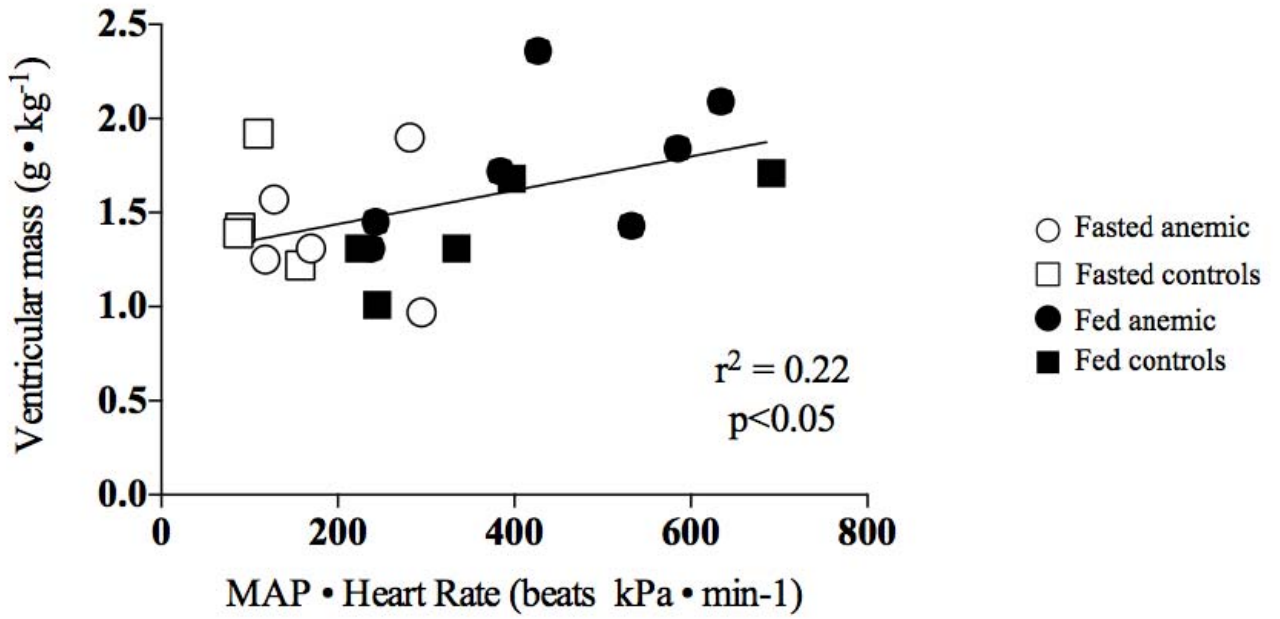

543



**A**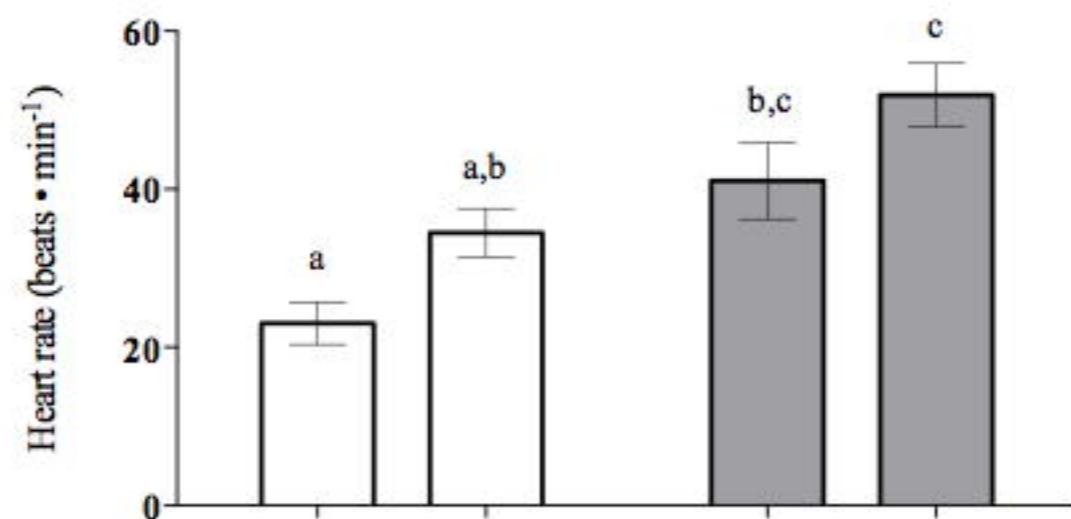**B**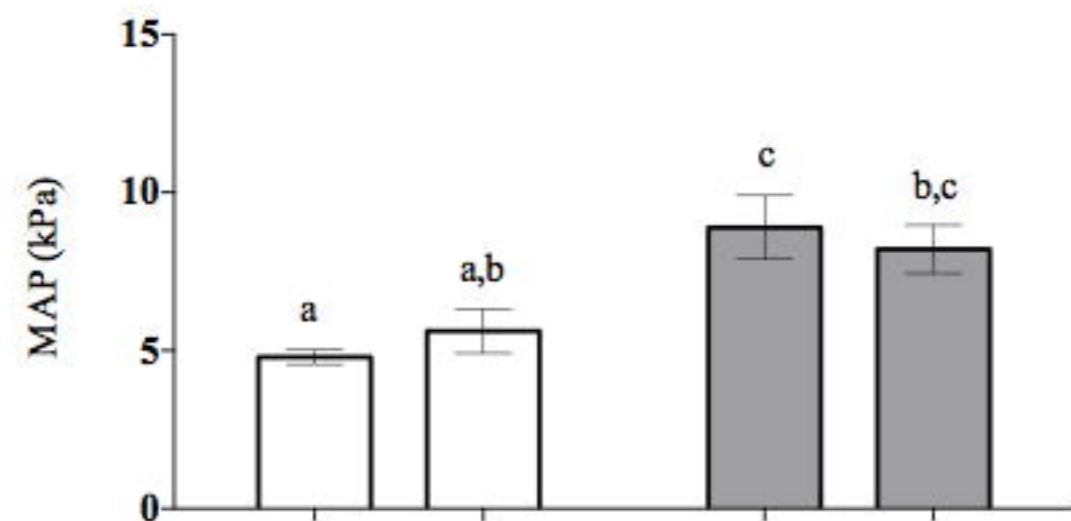**C**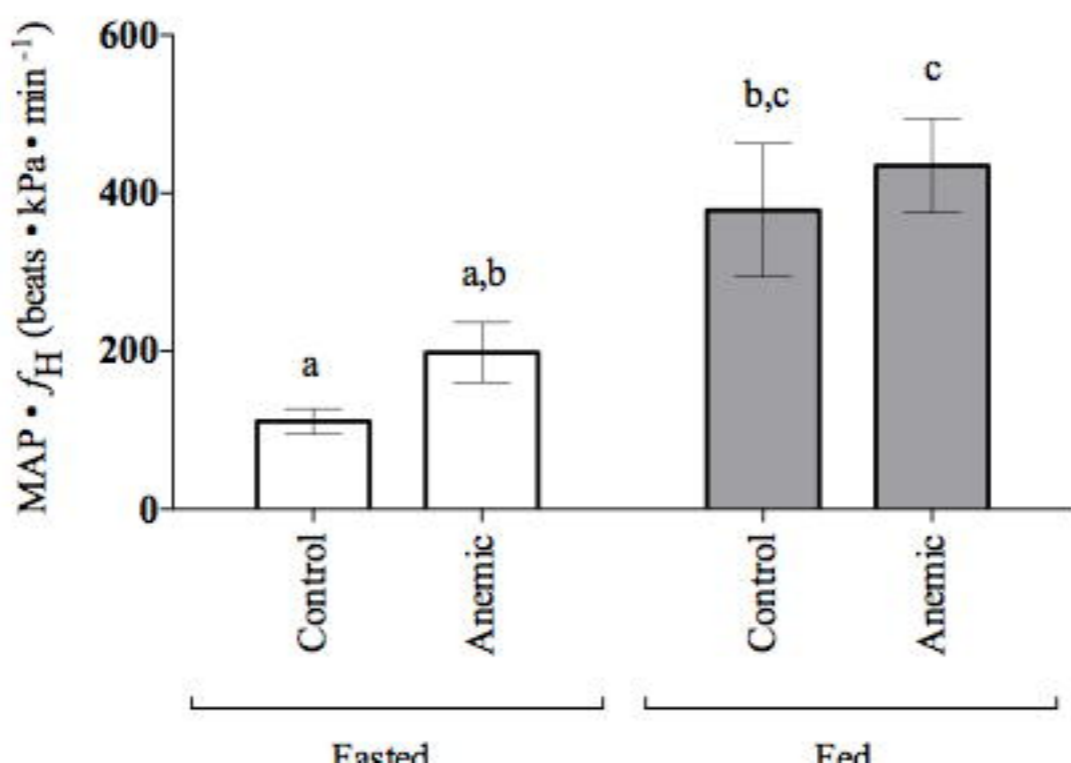

**A**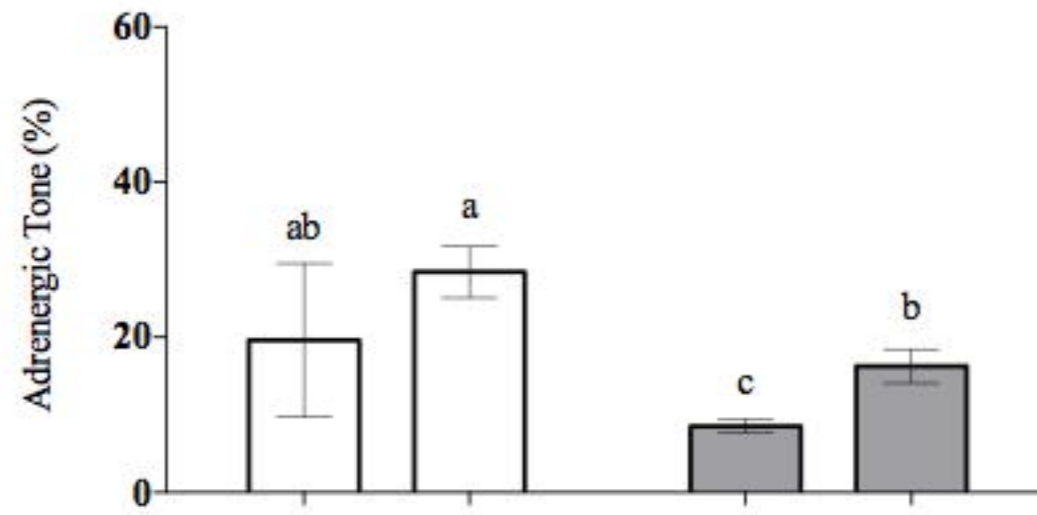**B**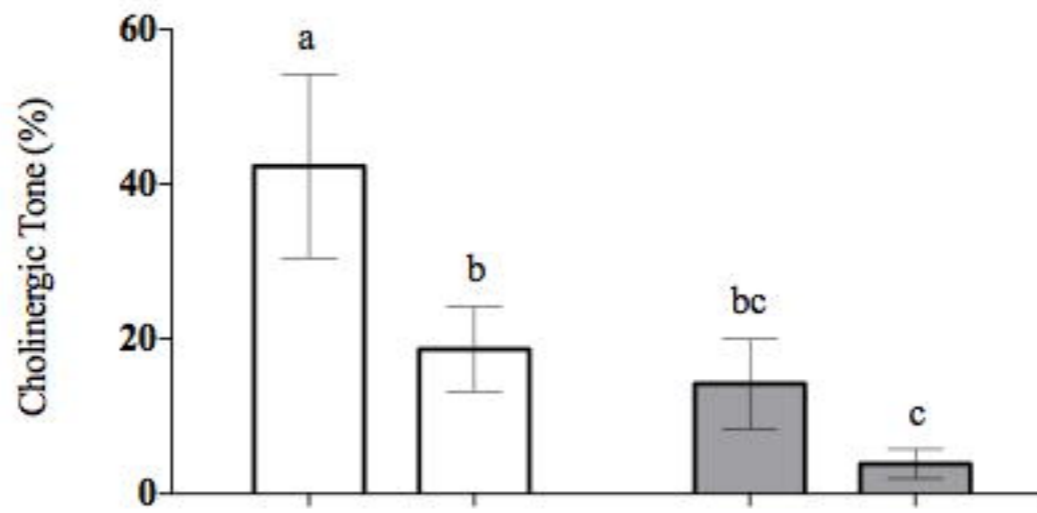**C**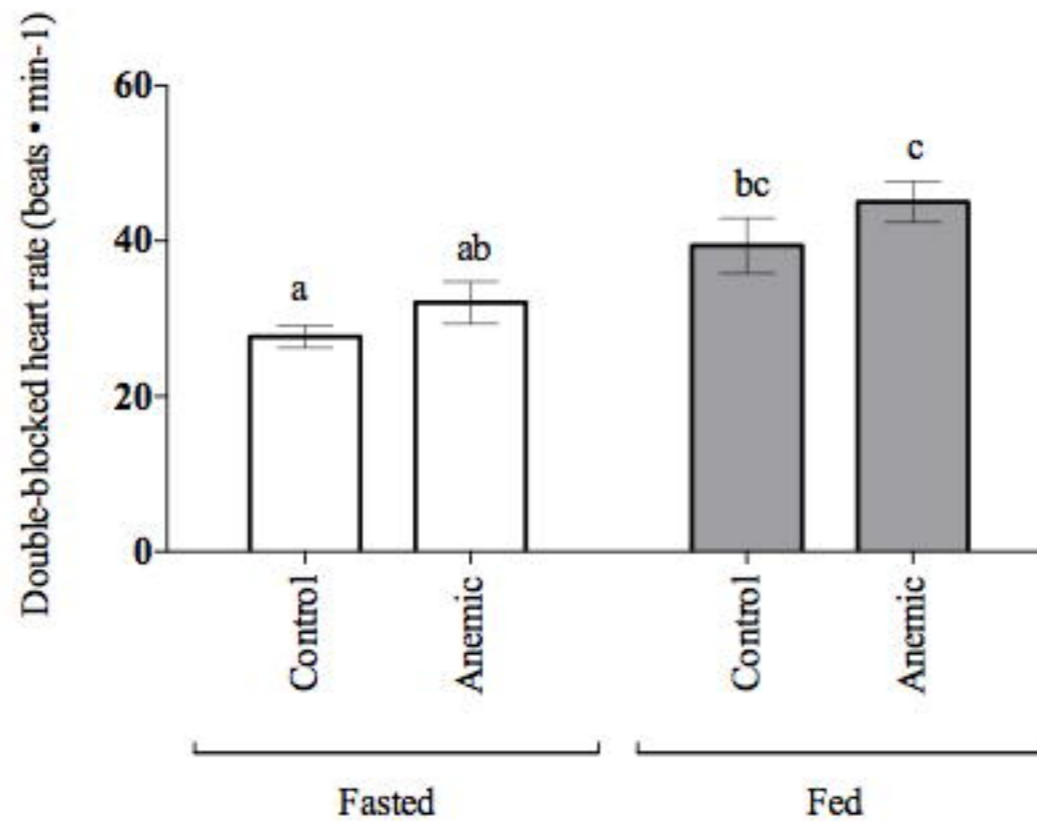

**A**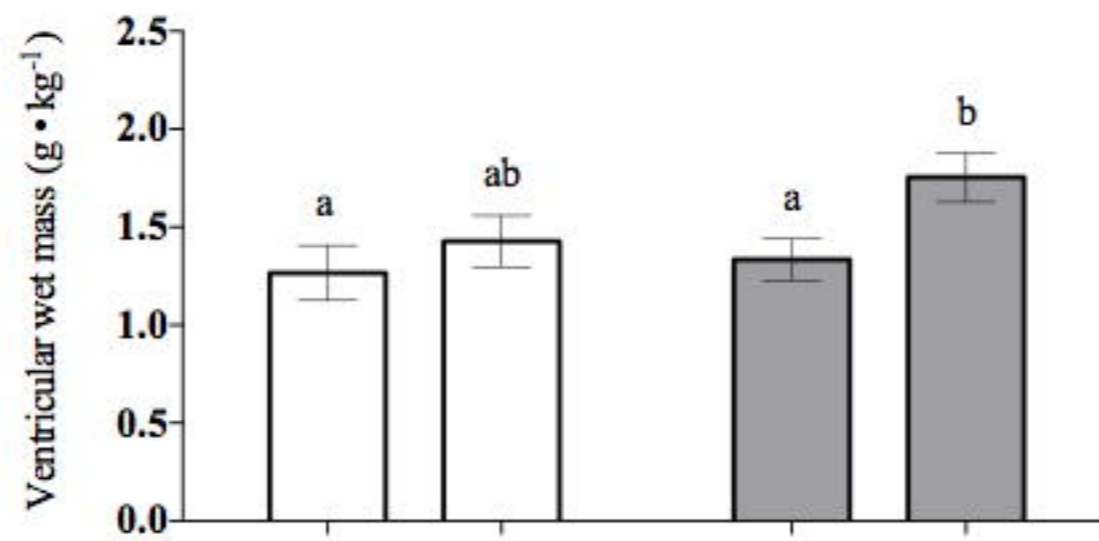**B**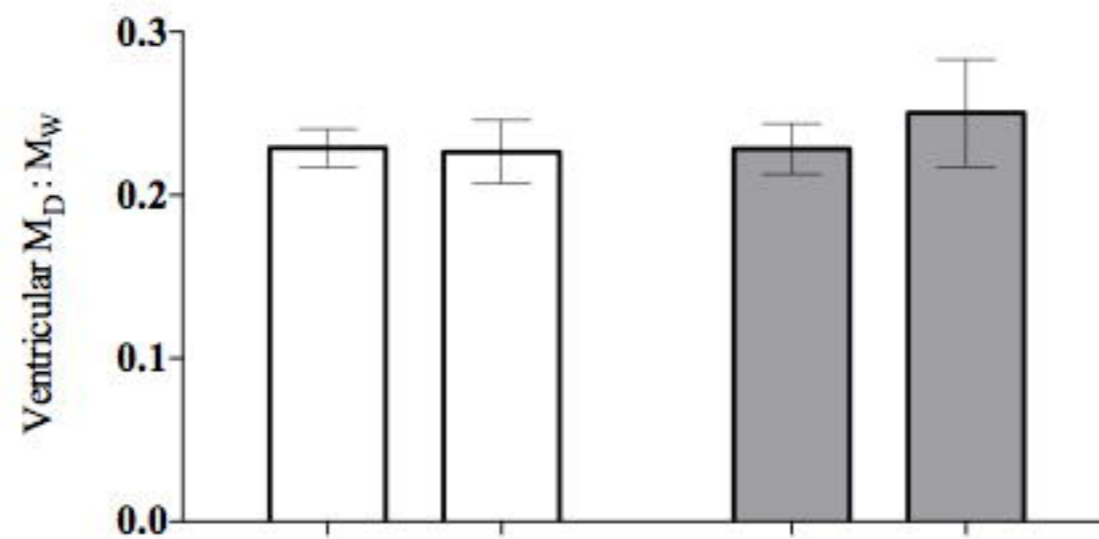**C**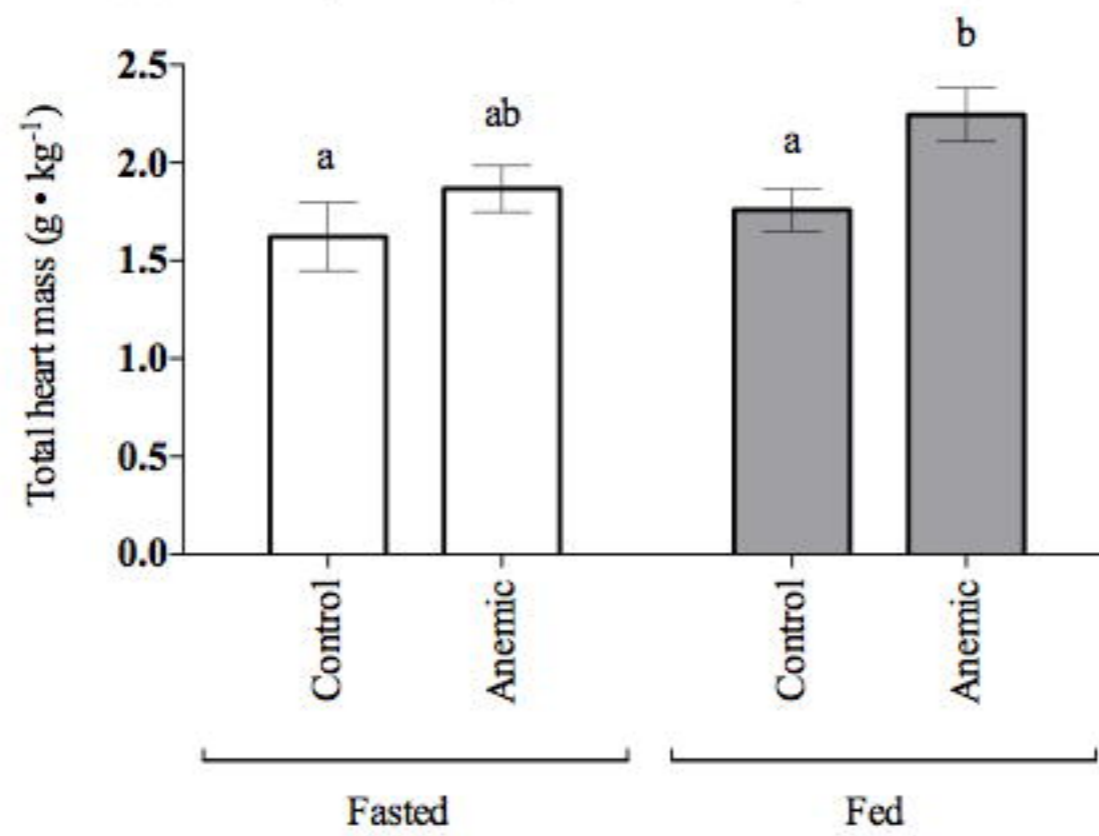

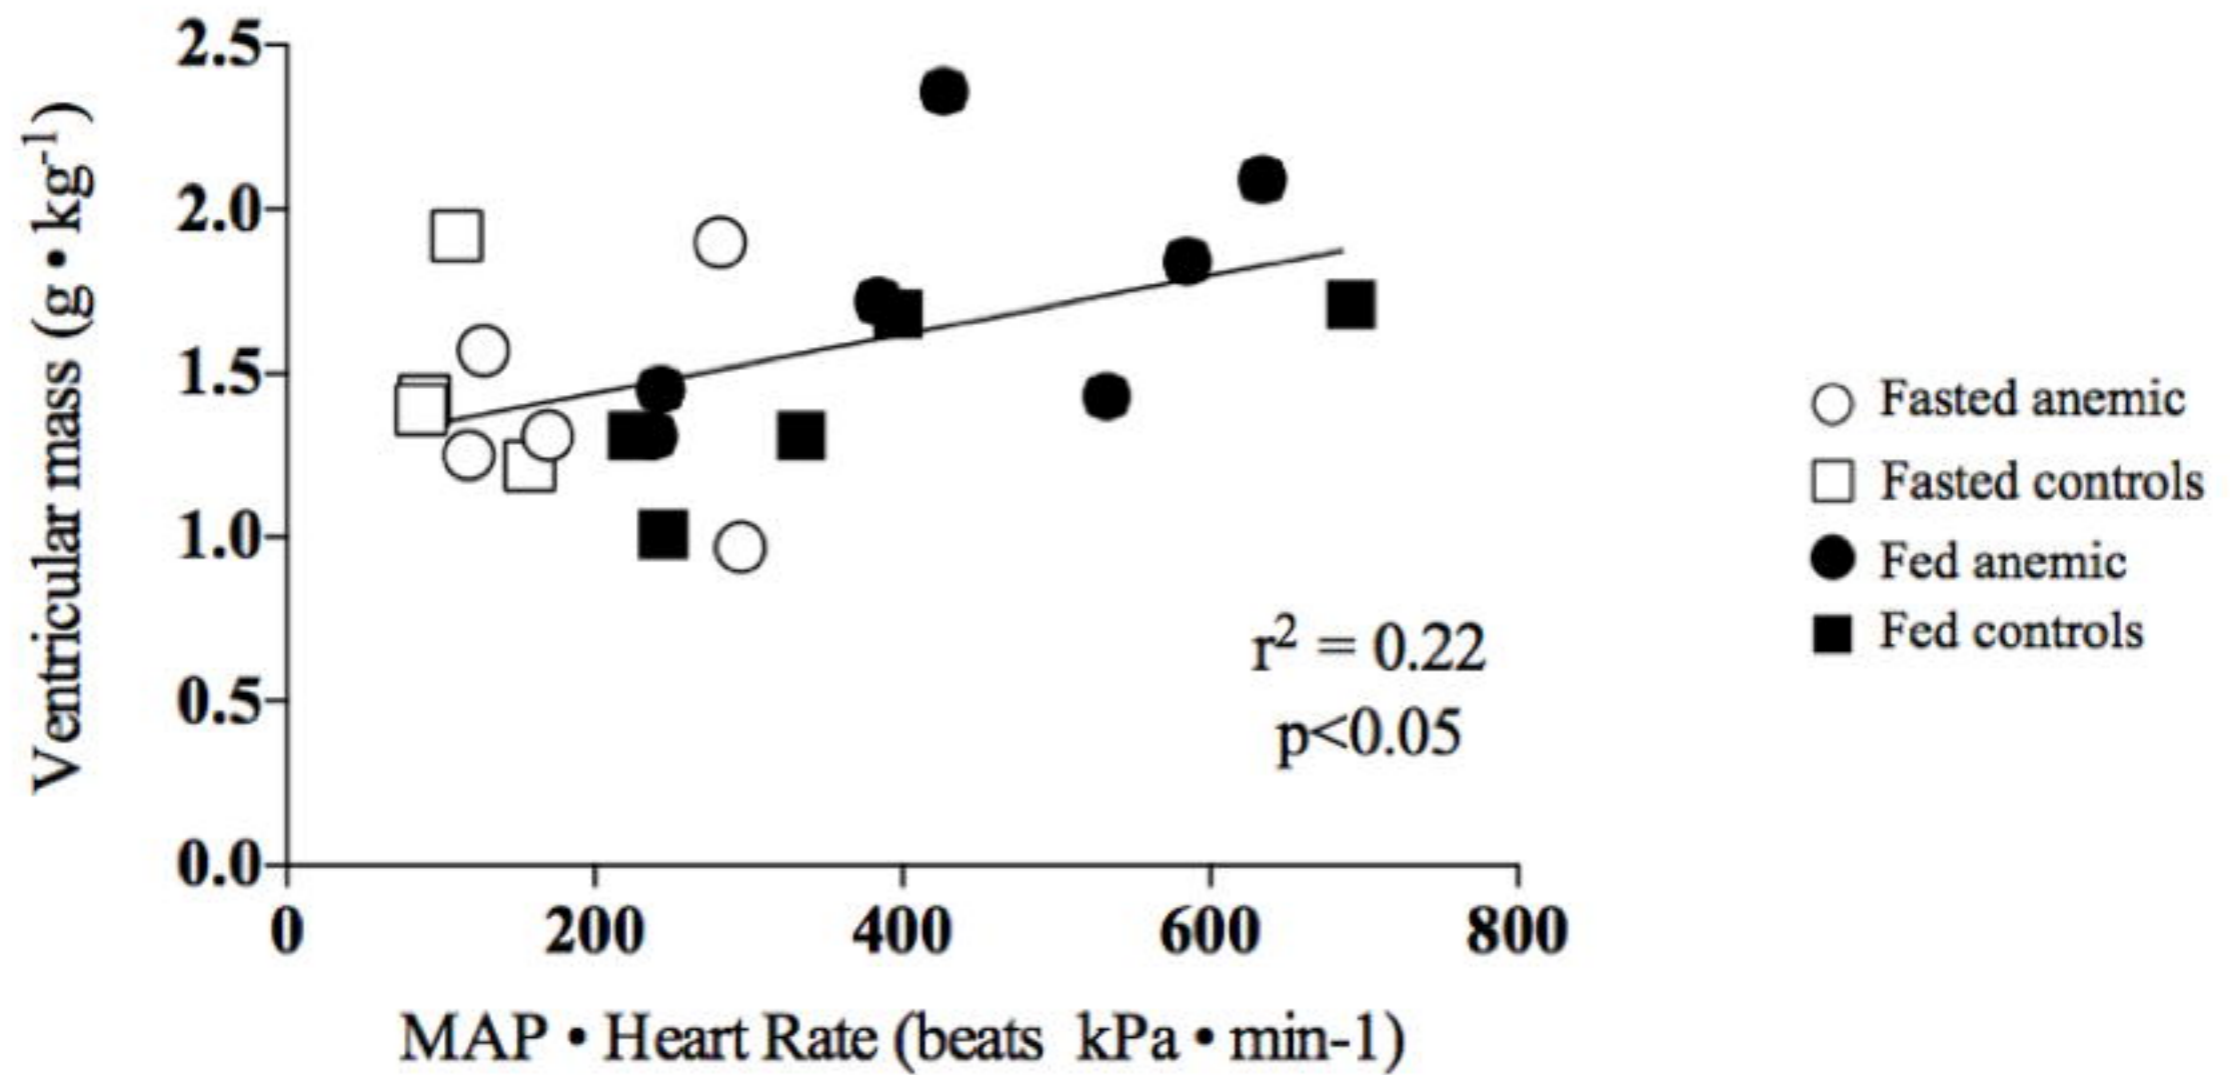

Source: https://cob.silverchair.com/jeb/article-pdf/doi/10.1242/jeb.092841/2037343/jeb_092841.pdf
